# Supplementary material
Source: publisher figshare collection journal article supplement (https://acs.figshare.com/ndownloader/files/21678021)
Supplement: Supplementary file 1 [file 21678021]

## Supporting Information

# The landscape of eukaryotic transmembrane beta barrel proteins

*Ahmed F. Roumia<sup>a</sup>, Margarita C. Theodoropoulou<sup>a</sup>, Konstantinos D. Tsirigos<sup>b,c</sup>,*

*Henrik Nielsen<sup>c</sup> and Pantelis G. Bagos<sup>a,\*</sup>*

<sup>a</sup>Department of Computer Science and Biomedical Informatics, University of  
Thessaly, 35100 Lamia, Greece

<sup>b</sup>Disease Systems Biology Program, Novo Nordisk Foundation Center for Protein  
Research, Faculty of Health and Medical Sciences, University of Copenhagen, DK-  
2200 Copenhagen, Denmark

<sup>c</sup>Department of Health Technology, Section for Bioinformatics, Technical University  
of Denmark, DK-2800 Kgs Lyngby, Denmark

E-mail: [pbagos@compugen.org](mailto:pbagos@compugen.org)

### Table of Contents

| Component     | Brief caption                                                                                                                                                      |
|---------------|--------------------------------------------------------------------------------------------------------------------------------------------------------------------|
| pHMMs_MSA.zip | Twelve pHMMs built during this study as well as their seed set alignments for all the eukaryotic trans-membrane $\beta$ -barrel families along with a README file. |
